## Correction

# Correction: Inhibition of IGF-1R Prevents Ionizing Radiation-Induced Primary Endothelial Cell Senescence

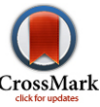

The *PLOS ONE* Staff

Figure 2 is truncated in the XML and PDF versions of the article. The journal apologizes for this error, which was introduced while the manuscript was being prepared for publication by production. Please see the correct Figure 2 below.

**Citation:** The *PLOS ONE* Staff (2014) Correction: Inhibition of IGF-1R Prevents Ionizing Radiation-Induced Primary Endothelial Cell Senescence. *PLoS ONE* 9(4): e96589. doi:10.1371/journal.pone.0096589

**Published** April 24, 2014

**Copyright:** © 2014 The *PLOS ONE* Staff. This is an open-access article distributed under the terms of the Creative Commons Attribution License, which permits unrestricted use, distribution, and reproduction in any medium, provided the original author and source are credited.

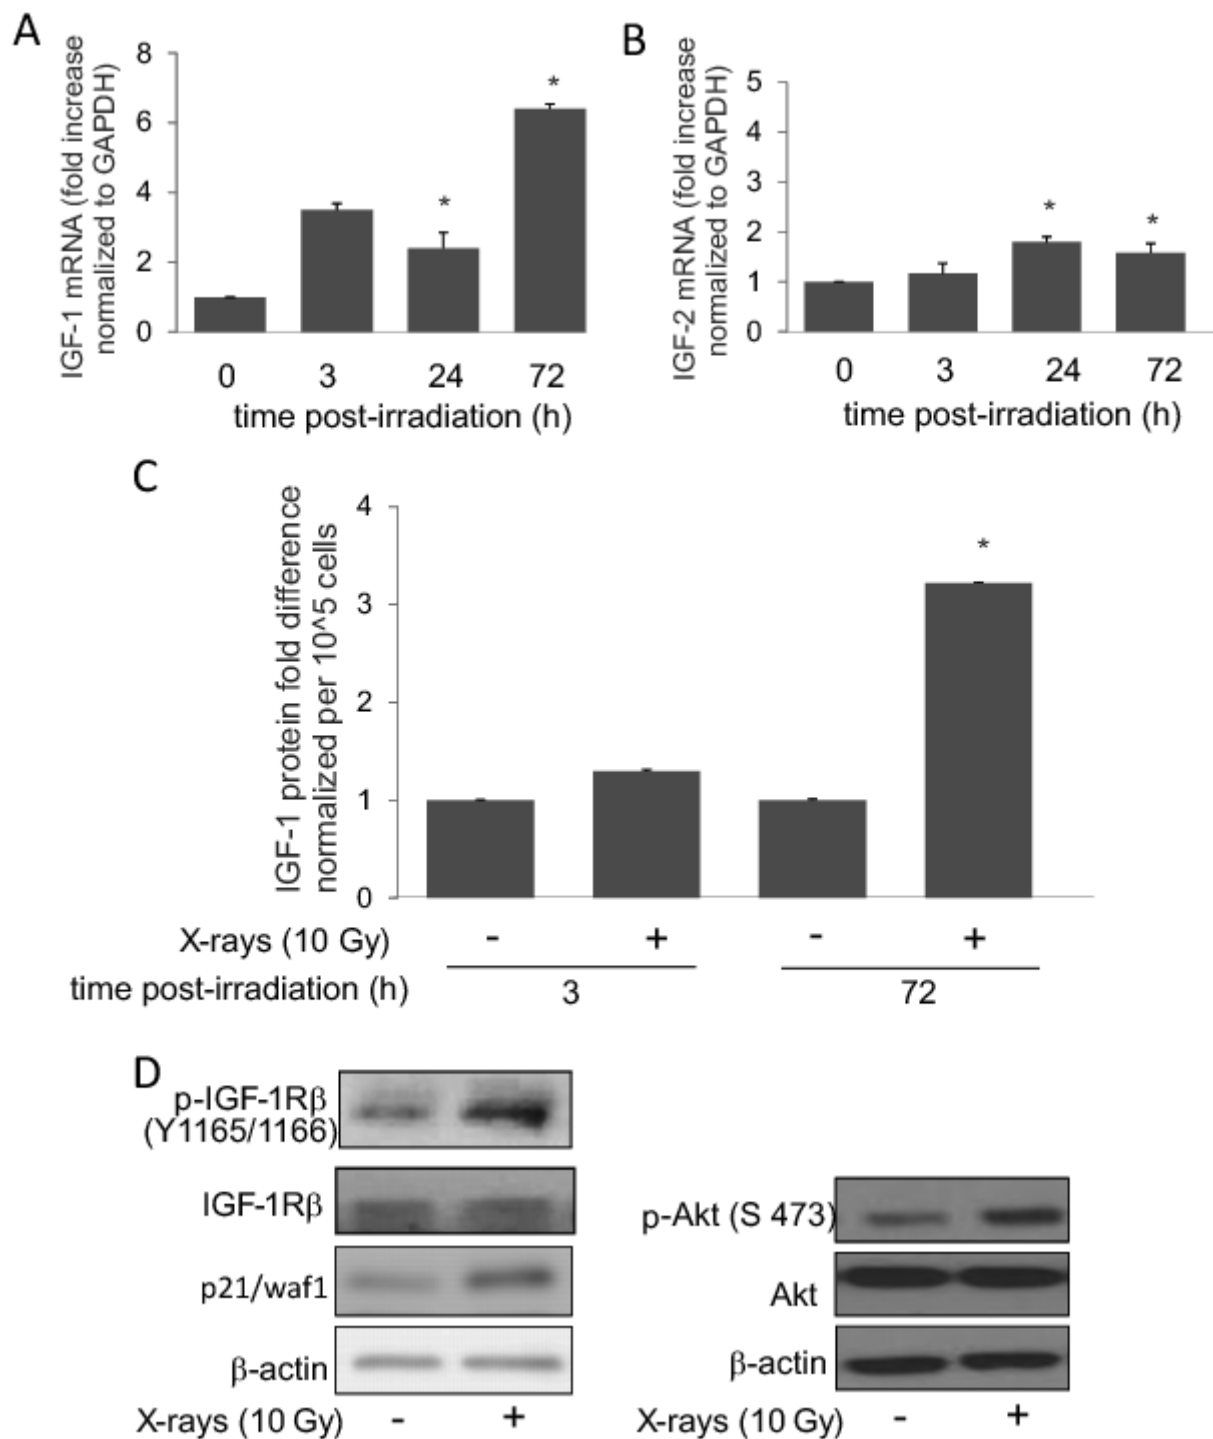

**Figure 2. Induction of IGF-1R signaling in irradiated HPAEC.** (A and B) IGF-1 and IGF-2 mRNA levels in irradiated HPAEC were assessed by qPCR at indicated time-points post-irradiation. The mRNA levels were normalized to GAPDH. Graph represents means  $\pm$  SD,  $n = 3$ . \* indicates statistical significance from controls,  $p < 0.05$ . (C) IGF-1 levels in secreted medium were measured by ELISA at indicated time-points post-irradiation. Graph represents means  $\pm$  SD,  $n = 3$ . \* indicates statistical significance from controls,  $p < 0.05$ . (D) Western blotting for expressions of proteins involved in IGF-1R hyperphosphorylation (left panel) and Akt hyperphosphorylation (Ser 473, right panel) at 3 hours post-irradiation. doi:10.1371/journal.pone.0078589.g002

## Reference

1. Panganiban RAM, Day RM (2013) Inhibition of IGF-1R Prevents Ionizing Radiation-Induced Primary Endothelial Cell Senescence. *PLoS ONE* 8(10): e78589. doi:10.1371/journal.pone.0078589
